# Supplementary material for: Glioma growth modeling based on the effect of vital nutrients and metabolic products
Source: Springer Nature journal article supplement (doi:10.1007/s11517-018-1809-0), 2018-03-08
Supplement: 11517_2018_1809_MOESM1_ESM.pdf [file 11517_2018_1809_MOESM1_ESM.pdf]

## Online Resource 1

**Article Title:** Glioma Growth Modeling based on the Effect of Vital Nutrients and Metabolic Products

**Journal Name:** Medical & Biological Engineering & Computing

**Author Names:** Maria Papadogiorgaki, Panagiotis Koliou and Michalis E. Zervakis

**Corresponding author:** Maria Papadogiorgaki

**Affiliation:** Digital Image and Signal Processing Laboratory, Electronic and Computer Engineering Department, Technical University of Crete

**E-mail Address:** [mpapadogiorgaki@isc.tuc.gr](mailto:mpapadogiorgaki@isc.tuc.gr)

**Online Resource 1** contains the supplementary mathematical formulas, which also have been used in the proposed model. It also includes a multi-page table where the parameter values used for the model simulations are listed.

## Additional Mathematical Equations

- Relative oxygen concentration coefficient:  $O = 1 - (b_h + a_n) \cdot n_h$
- Coefficient related to the critical oxygen concentration for the proliferative cells to turn to hypoxic: 
$$\left\{ \begin{array}{l} n_h = 0, o(l, t) > 0 \\ n_h = 1, o(l, t) \leq 0 \end{array} \right\}$$
- Conversion rate of proliferative cells to hypoxic:  $b_h = (1 - \frac{o_{imp}(l, t)}{o_0}) / 20$
- Relative glucose concentration coefficient:  $Gl = 1 - (b_q + a_n) \cdot gl_q$
- Coefficient related to the critical glucose concentration for the proliferative cells to turn to hypoglycemic: 
$$\left\{ \begin{array}{l} gl_q = 0, gl(l, t) > 0 \\ gl_q = 1, gl(l, t) \leq 0 \end{array} \right\}$$
- Conversion rate of proliferative cells to hypoglycemic:  $b_q = (1 - \frac{gl_{imp}(l, t)}{gl_0}) / 20$
- Relative lactate concentration:  $La = \frac{la(l, t) - la_0}{la(l, t)}$
- Relative H<sup>+</sup> concentration:  $H_{ions} = \frac{h(l, t) - h_0}{h(l, t)}$
- Coefficient related to the pH threshold that determines the beginning of the proliferation rate decrease:  $pH_{pr} = pH_{valPr} - (-\log(h(l, t) \cdot 10^6))$  and  $\left\{ \begin{array}{l} pH_{pr} > 0 \Rightarrow pH_{pr} = 1 \\ pH_{pr} < 0, pH_{pr} = 0 \end{array} \right\}$
- Coefficient related to the pH threshold for the proliferative cells to turn to quiescent (stop proliferating):  $pH_q = -\log(h(l, t) \cdot 10^6) - pH_{valQ}$  and  $\left\{ \begin{array}{l} pH_q > 0 \Rightarrow pH_q = 1 \\ pH_q < 0, pH_q = 0 \end{array} \right\}$
- Coefficient related to the pH threshold for the acidic cells to turn to necrotic:  $pH_n = -\log(h(l, t) \cdot 10^6) - pH_{valN}$  and  $\left\{ \begin{array}{l} pH_n > 0 \Rightarrow pH_n = 1 \\ pH_n < 0, pH_n = 0 \end{array} \right\}$
- Conversion rate of proliferative to acidic cells and acidic to proliferative:  $b_a = g_a = 1 - (b_h \cdot n_h + b_q \cdot gl_q + N(l, t) \cdot a_n)$

- Threshold for the hypoxic cells to turn to necrotic due to the absence of oxygen:

$$\left\{ \begin{array}{l} \frac{H(l,t)}{H(l,t) + C(l,t) + Q(l,t) + A(l,t)} > 0.9 \\ n_h = 1 \end{array} \right\} \Rightarrow n_{hn} = 1$$

- Threshold for the hypoxic cells to turn to necrotic due to the absence of glucose:

$$\left\{ \begin{array}{l} n_h = 1 \\ gl_q = 1 \end{array} \right\} \Rightarrow gl_{hn} = 1$$

- Threshold for the hypoglycemic cells to turn to necrotic due to the absence of glucose:

$$\left\{ \begin{array}{l} \frac{Q(l,t)}{H(l,t) + C(l,t) + Q(l,t) + A(l,t)} > 0.75 \\ gl_q = 1 \end{array} \right\} \Rightarrow gl_{qn} = 1$$

- Threshold for the hypoglycemic cells to turn to necrotic due to the absence of oxygen:

$$\left\{ \begin{array}{l} n_h = 1 \\ gl_q = 1 \end{array} \right\} \Rightarrow n_{qn} = 1$$

- Concentration change of hypoglycemic cells:

$$\begin{aligned} \frac{\partial Q(l,t)}{\partial t} = & \nabla \cdot (D_{ql}(l,t) \cdot (1-T) \nabla Q(l,t)) + (C(l,t) \cdot b_q \cdot gl_q + A(l,t) \cdot b_q \cdot gl_q - Q(l,t) \cdot g_q \cdot (1-gl_q) \\ & - Q(l,t) \cdot a_q \cdot n_{qn} - Q(l,t) \cdot a_{glq} \cdot gl_{qn} - Q(l,t) \cdot N(l,t) \cdot a_n) \cdot pH_n - Q(l,t) \cdot (1-pH_n) \end{aligned}$$

- Concentration change of glucose:

$$\begin{aligned} \frac{\partial gl(l,t)}{\partial t} = & D_{gl} \nabla^2 gl(l,t) + \beta_{gl} \cdot e(l,t) - (\gamma_{cgl1} \cdot (1-n_h) + \gamma_{cgl1} \cdot n_h) \cdot C(l,t) \\ & - \gamma_{hgl} \cdot H(l,t) - \gamma_{qgl} \cdot Q(l,t) - \gamma_{agl} \cdot A(l,t) - \varepsilon_{gl} \cdot gl(l,t) \end{aligned}$$

**Table 1 - Parameter Values**

| Parameters                                                                      | Symbols      | Values               | Units                 |
|---------------------------------------------------------------------------------|--------------|----------------------|-----------------------|
| Tissue maximum carrying capacity                                                | $C_m$        | $2.39 \cdot 10^5$    | cells/mm <sup>3</sup> |
| Initial spherical tumor cell density                                            | $C_0$        | $3 \cdot 10^4$       | cells/mm <sup>3</sup> |
| Initial real tumor cell density                                                 | $C_{0r}$     | $5 \cdot 10^4$       | cells/mm <sup>3</sup> |
| Initial spherical tumor cell density for model validation                       | $C_{0v}$     | $10^5$               | cells/mm <sup>3</sup> |
| Initial spherical tumor radius                                                  | $r_0$        | 1                    | mm                    |
| Initial Diffusion coefficient of proliferative cells                            | $D_c = D_w$  | 0.005, 0.3           | mm <sup>2</sup> /day  |
| Initial Diffusion coefficient of hypoxic cells                                  | $D_h$        | $D_c \cdot 10$       | mm <sup>2</sup> /day  |
| Initial Diffusion coefficient of hypoglycemic cells                             | $D_q$        | $D_c$                | mm <sup>2</sup> /day  |
| Initial Diffusion coefficient of acidic cells                                   | $D_a$        | $D_c$                | mm <sup>2</sup> /day  |
| Low and high cell-diffusion coefficients for model validation (spherical tumor) | $D_{cv}$     | 0.01, 0.06           | mm <sup>2</sup> /day  |
| Cell-diffusion coefficient for model validation (real tumor)                    | $D_{cvr}$    | 0.01                 | mm <sup>2</sup> /day  |
| Proliferation rate constant                                                     | $\rho$       | 0.0025, 0.04         | 1/day                 |
| Low and high cell-proliferation rates for model validation (spherical tumor)    | $\rho_v$     | 0.013, 0.033         | 1/day                 |
| Cell-proliferation rate for model validation (real tumor)                       | $\rho_{vr}$  | 0.005                | 1/day                 |
| Initial ECM concentration outside the tumor                                     | $f_0$        | $10^{-9}$            | mol/mm <sup>3</sup>   |
| Initial intratumoral ECM concentration                                          | $f_{0tumor}$ | $0.9 \cdot 10^{-9}$  | mol/mm <sup>3</sup>   |
| Initial MDEs concentration outside the tumor                                    | $m_0$        | 0                    | mol/mm <sup>3</sup>   |
| Initial intratumoral MDEs concentration                                         | $m_{0tumor}$ | $0.5 \cdot C_0$      | mol/mm <sup>3</sup>   |
| Initial oxygen concentration outside the tumor                                  | $o_0$        | $0.28 \cdot 10^{-9}$ | mol/mm <sup>3</sup>   |
| Initial intratumoral oxygen concentration (spherical geometry)                  | $o_{0tumor}$ | $o_0 \cdot e^{-dr}$  | mol/mm <sup>3</sup>   |
| Initial intratumoral oxygen concentration (real geometry)                       | $o_{0tumor}$ | $0.5 \cdot o_0$      | mol/mm <sup>3</sup>   |
| Initial glucose concentration outside the                                       | $gl_0$       | $16.5 \cdot 10^{-9}$ | mol/mm <sup>3</sup>   |

|                                                                                                 |                      |                         |                                       |
|-------------------------------------------------------------------------------------------------|----------------------|-------------------------|---------------------------------------|
| tumor                                                                                           |                      |                         |                                       |
| Initial intratumoral glucose concentration<br>(spherical geometry)                              | $gl_{0\text{tumor}}$ | $gl_0 * e^{-d(r)}$      | $\text{mol}/\text{mm}^3$              |
| Initial intratumoral glucose concentration<br>(real geometry)                                   | $gl_{0\text{tumor}}$ | $0.5 * gl_0$            | $\text{mol}/\text{mm}^3$              |
| Initial lactate concentration outside the<br>tumor                                              | $la_0$               | $10^{-10}$              | $\text{mol}/\text{mm}^3$              |
| Initial intratumoral lactate concentration                                                      | $la_{0\text{tumor}}$ | $10 * la_0$             | $\text{mol}/\text{mm}^3$              |
| Initial $H^+$ concentration outside the tumor<br>(Extra-tumoral pH=7.4)                         | $h_0$                | $3.98 * 10^{-14}$       | $\text{mol}/\text{mm}^3$              |
| Initial intratumoral $H^+$ concentration<br>(Intratumoral pH=7.1)                               | $h_{0\text{tumor}}$  | $7.94 * 10^{-14}$       | $\text{mol}/\text{mm}^3$              |
| Reduced proliferation rate pH value                                                             | $pH_{\text{valPr}}$  | 6.8                     | -                                     |
| Quiescent acidic pH value                                                                       | $pH_{\text{valQ}}$   | 6.4                     | -                                     |
| Necrotic pH value                                                                               | $pH_{\text{valN}}$   | 6                       | -                                     |
| Diffusion coefficient of MDEs                                                                   | $D_m$                | 0.00864                 | $\text{mm}^2/\text{day}$              |
| Diffusion coefficient of oxygen                                                                 | $D_o$                | 157.248                 | $\text{mm}^2/\text{day}$              |
| Diffusion coefficient of glucose                                                                | $D_{gl}$             | 9.504                   | $\text{mm}^2/\text{day}$              |
| Diffusion coefficient of lactate                                                                | $D_{la}$             | 15.379                  | $\text{mm}^2/\text{day}$              |
| Diffusion coefficient of $H^+$                                                                  | $D_{ph}$             | 155.52                  | $\text{mm}^2/\text{day}$              |
| Oxygen natural decay rate                                                                       | $\epsilon_o$         | 0.0375                  | 1/day                                 |
| Oxygen production rate                                                                          | $\beta_o$            | 0.5025                  | 1/day                                 |
| Glucose natural decay rate                                                                      | $\alpha_{gl}$        | 0.11                    | 1/day                                 |
| Glucose production rate                                                                         | $\beta_{gl}$         | 1.1                     | 1/day                                 |
| Lactate excretion rate                                                                          | $\epsilon_{la}$      | 0.8                     | 1/day                                 |
| $H^+$ excretion rate                                                                            | $\epsilon_{ph}$      | 2592                    | 1/day                                 |
| Oxygen consumption rate by proliferative<br>cells under normoxic conditions (60%<br>glycolysis) | $\gamma_{co1}$       | $5.52 * 10^{-12}$       | $\text{mol}/\text{cell} * \text{day}$ |
| Oxygen consumption rate by proliferative<br>cells under hypoxic conditions (75%<br>glycolysis)  | $\gamma_{co2}$       | $5.175 * 10^{-12}$      | $\text{mol}/\text{cell} * \text{day}$ |
| Oxygen consumption rate by hypoxic cells<br>(99% glycolysis)                                    | $\gamma_{ho}$        | $6.9 * 10^{-13}$        | $\text{mol}/\text{cell} * \text{day}$ |
| Oxygen consumption rate by hypoglycemic<br>cells under normoxic conditions (60%                 | $\gamma_{qo1}$       | $0.8125 * \gamma_{cn1}$ | $\text{mol}/\text{cell} * \text{day}$ |

|                                                                                                  |                 |                          |              |
|--------------------------------------------------------------------------------------------------|-----------------|--------------------------|--------------|
| glycolysis)                                                                                      |                 |                          |              |
| Oxygen consumption rate by hypoglycemic cells under hypoxic conditions (60% glycolysis)          | $\gamma_{qo2}$  | $0.5 * \gamma_{cn1}$     | mol/cell*day |
| Oxygen consumption rate by acidic cells (50% glycolysis)                                         | $\gamma_{ao}$   | $3.45 * 10^{-12}$        | mol/cell*day |
| Glucose consumption rate by proliferative cells under normoxic conditions (60% glycolysis)       | $\gamma_{cgl1}$ | $2.3 * 10^{-12}$         | mol/cell*day |
| Glucose consumption rate by proliferative cells under hypoxic conditions (75% glycolysis)        | $\gamma_{cgl2}$ | $0.5 * \gamma_{cgl1}$    | mol/cell*day |
| Glucose consumption rate by hypoxic cells                                                        | $\gamma_{hgl}$  | $1.15 * 10^{-11}$        | mol/cell*day |
| Glucose consumption rate by hypoglycemic cells                                                   | $\gamma_{qgl}$  | $0.5 * \gamma_{cgl1}$    | mol/cell*day |
| Glucose consumption rate by acidic cells                                                         | $\gamma_{agl}$  | $0.5 * \gamma_{cgl1}$    | mol/cell*day |
| Lactate consumption rate by proliferative cells under hypoxic conditions                         | $\gamma_{cla}$  | $0.5 * \gamma_{cgl1}$    | mol/cell*day |
| Lactate consumption rate by hypoglycemic cells under normoxic conditions                         | $\gamma_{qla}$  | $0.25 * \gamma_{cgl1}$   | mol/cell*day |
| Lactate production rate by proliferative cells under normoxic conditions (60% glycolysis)        | $\beta_{cla1}$  | $1.2 * \gamma_{cgl1}$    | mol/cell*day |
| Lactate production rate by proliferative cells under hypoxic conditions (75% glycolysis)         | $\beta_{cla2}$  | $0.75 * \gamma_{cgl1}$   | mol/cell*day |
| Lactate production rate by hypoxic cells (75% glycolysis)                                        | $\beta_{hla}$   | $1.98 * \gamma_{hgl}$    | mol/cell*day |
| Lactate production rate by hypoglycemic cells (60% glycolysis)                                   | $\beta_{qla}$   | $1.2 * \gamma_{qgl}$     | mol/cell*day |
| Lactate production rate by acidic cells (50% glycolysis)                                         | $\beta_{ala}$   | $\gamma_{agl}$           | mol/cell*day |
| H <sup>+</sup> production rate by proliferative cells under normoxic conditions (60% glycolysis) | $\beta_{ch1}$   | $\beta_{cla1} * 10^{-3}$ | mol/cell*day |
| H <sup>+</sup> production rate by proliferative cells under hypoxic conditions (75% glycolysis)  | $\beta_{ch2}$   | $\beta_{cla2} * 10^{-3}$ | mol/cell*day |
| H <sup>+</sup> production rate by hypoxic cells (75% glycolysis)                                 | $\beta_{hh}$    | $\beta_{hla} * 10^{-3}$  | mol/cell*day |

|                                                                                                                       |              |                          |                            |
|-----------------------------------------------------------------------------------------------------------------------|--------------|--------------------------|----------------------------|
| H <sup>+</sup> production rate by hypoglycemic cells (60% glycolysis)                                                 | $\beta_{qh}$ | $\beta_{qla} * 10^{-3}$  | mol/cell*day               |
| H <sup>+</sup> production rate by acidic cells (50% glycolysis)                                                       | $\beta_{ah}$ | $\beta_{ala}$            | mol/cell*day               |
| ECM degradation rate                                                                                                  | $\delta$     | 0.0022388                | mm <sup>3</sup> /mol*day   |
| MDEs natural decay rate                                                                                               | $\lambda$    | 0.432                    | 1/day                      |
| MDEs production rate by proliferative cells                                                                           | $\mu_c$      | 0.006                    | mol/cell*day               |
| MDEs production rate by hypoxic cells                                                                                 | $\mu_h$      | $2 * \mu_c$              | mol/cell*day               |
| MDEs production rate by hypoglycemic cells                                                                            | $\mu_q$      | $\mu_c$                  | mol/cell*day               |
| Conversion rate of hypoxic to proliferative or acidic cells                                                           | $g_h$        | 0.05                     | 1/day                      |
| Conversion rate of hypoxic to necrotic cells due to lack of oxygen                                                    | $a_h$        | $b_h/10$                 | 1/day                      |
| Conversion rate of hypoxic to necrotic cells due lack of glucose                                                      | $a_{gh}$     | 0.01                     | 1/day                      |
| Conversion rate of hypoglycemic to proliferative or acidic cells                                                      | $g_q$        | 0.05                     | 1/day                      |
| Conversion rate of hypoglycemic to necrotic cells due to lack of oxygen                                               | $a_q$        | 0.01                     | 1/day                      |
| Conversion rate of hypoglycemic to necrotic cells due lack of glucose                                                 | $a_{glq}$    | $b_q/10$                 | 1/day                      |
| Conversion rate of proliferative, hypoxic, hypoglycemic, acidic to necrotic cells due to contact with necrotic region | $a_n$        | $\log(2)/(50C_m * 10^2)$ | mm <sup>3</sup> /day*cells |
| Time step                                                                                                             | dt           | 0.0005                   | days                       |
| Spatial grid dimensions of spherical tumor                                                                            | dr           | 0.2                      | mm                         |
| Spatial grid dimensions of RIDER-NEURO tumor                                                                          | dx, dy, dz   | 1, 1, 1                  | mm                         |
| Spatial grid dimensions of clinical real tumor                                                                        | dx, dy, dz   | 0.599, 0.599, 0.725      | mm                         |
